# Supplementary material
Source: publisher figshare collection journal article supplement (https://gsajournals.figshare.com/ndownloader/files/29131170)
Supplement: Supplementary file 1 [file 29131170]

**File S2. Evidences supporting positive selection in the PLEK2 region.**

A ~1Mb region significantly enriched in candidate SNPs of selection was detected in European populations only (Table S3). This region encompasses functional variants controlling the expression of the *PLEK2* gene in skin cells exposed to sun, i.e., eQTLs in the GTEx database (Ardlie et al. 2015) (no eQTL found in skin not exposed to sun (Ardlie et al. 2015)). *PLEK2* overexpression causes large lamellipodia (Hu et al. 1999), is characteristic of disseminated tumor cells (Naume et al. 2007) and has been detected in analyses of the blood of ~80% of melanoma patients. *PLEK2* serves as a biomarker for the disease (Luo et al. 2011). In addition, the survival probability was found diminished in patients with the highest *PLEK2* overexpression (<https://www.proteinatlas.org/ENSG00000100558-PLEK2/pathology/tissue/melanoma>). At the protein level, expression has been found higher in melanoma cells than in normal tissue (Uhlen et al. 2015).

In this study, we found that alleles downregulating *PLEK2* harbor signatures indicative of positive selection. Interestingly, these variants which affect the sensitivity to UV-induced melanoma appear to have been under selection in European populations, while this selection signal was not found in Africa and Asia (Table S3). Prevalence of UV-induced melanoma is more than 20 times more common in European Americans than in African Americans (the lifetime risk of getting melanoma is 2.5% and 0.1% in European and African Americans respectively, the American Cancer Society). Finally, in current Europeans, the level of *PLEK2* expression in skin and the risk of developing UV-induced melanoma both increase with age (Glass et al. 2013) (mean age of patients is ~63 years old in US but melanoma is not uncommon among those younger than 30, the American Cancer Society). The latter observation is consistent with the role of natural selection in the maintenance of low *PLEK2* expression in early stages of life. All these observations suggest that the European-specific signal of recent selection shared among all European populations is due to mutations downregulating the expression of the *PLEK2* gene. Note, the pedigree-based recombination rate (Rutgers maps v3) in PLEK2 is equal to 0.53cM/Mb (Matise et al. 2007), a value similar to the recombination rate in the LCT region (O'Reilly et al. 2008).

In addition, we may speculate that the alleles downregulating *PLEK2* could have been favored by selection during the late Pleistocene climatic warming (~20 to ~10kya) ending the last ice age (~110 to ~10kya) (Cooper et al. 2015). Cold paleoclimate in Europe likely favored both light skin pigmentation and increased sensitivity to UV-induced melanoma (Key et al. 2016; Lopez et al. 2014). As high expression of *PLEK2* may decrease the survival probability in melanoma patients, the alleles downregulating *PLEK2* could have been recently favored during this period as supported by a selection signal of ~1-1.2Mb indicative of a recent onset of selection. This speculative interpretation needs to be further tested by formally estimating the age of selection in this genomic region to verify if the onset of selection coincides with the increase of regional temperatures and solar luminosity in the northern hemisphere.

GTEx (Genotype-Tissue Expression Project) <http://gtexportal.org/home/>, DAA (Digital Aging Atlas) <http://ageing-map.org/>, the human protein atlas <http://www.proteinatlas.org>, the American Cancer Society <https://www.cancer.org/>, NCBI gene database <https://www.ncbi.nlm.nih.gov/gene/26499>

**References**

Ardlie KG, DeLuca DS, Segre AV, Sullivan TJ, Young TR, Gelfand ET, Trowbridge CA, Maller JB, Tukiainen T, Lek M et al. 2015. The genotype-tissue expression (gtex) pilot analysis: Multitissue gene regulation in humans. Science. 348(6235):648-660.

Cooper A, Turney C, Hughen KA, Brook BW, McDonald HG, Bradshaw CJ. 2015. Paleoecology. Abrupt warming events drove late pleistocene holarctic megafaunal turnover. Science. 349(6248):602-606.

Glass D, Vinuela A, Davies MN, Ramasamy A, Parts L, Knowles D, Brown AA, Hedman AK, Small KS, Buil A et al. 2013. Gene expression changes with age in skin, adipose tissue, blood and brain. Genome Biol. 14(7):R75.

Hu MH, Bauman EM, Roll RL, Yeilding N, Abrams CS. 1999. Pleckstrin 2, a widely expressed paralog of pleckstrin involved in actin rearrangement. Journal of Biological Chemistry. 274(31):21515-21518.

Key FM, Fu Q, Romagne F, Lachmann M, Andres AM. 2016. Human adaptation and population differentiation in the light of ancient genomes. Nat Commun. 7:10775.

Lopez S, Garcia O, Yurrebaso I, Flores C, Acosta-Herrera M, Chen H, Gardeazabal J, Careaga JM, Boyano MD, Sanchez A et al. 2014. The interplay between natural selection and susceptibility to melanoma on allele 374f of slc45a2 gene in a south european population. Plos One. 9(8).

Luo Y, Robinson S, Fujita J, Siconolfi L, Magidson J, Edwards CK, Wassmann K, Storm K, Norris DA, Bankaitis-Davis D et al. 2011. Transcriptome profiling of whole blood cells identifies plek2 and c1qb in human melanoma. Plos One. 6(6):e20971.

Matise TC, Chen F, Chen W, De La Vega FM, Hansen M, He C, Hyland FC, Kennedy GC, Kong X, Murray SS et al. 2007. A second-generation combined linkage physical map of the human genome. Genome Res. 17(12):1783-1786.

Naume B, Zhao X, Synnestvedt M, Borgen E, Russnes HG, Lingjaerde OC, Stromberg M, Wiedswang G, Kvalheim G, Karesen R et al. 2007. Presence of bone marrow micrometastasis is associated with different recurrence risk within molecular subtypes of breast cancer. Molecular Oncology. 1(2):160-171.

O'Reilly PF, Birney E, Balding DJ. 2008. Confounding between recombination and selection, and the ped/pop method for detecting selection. Genome Res. 18(8):1304-1313.

Uhlen M, Fagerberg L, Hallstrom BM, Lindskog C, Oksvold P, Mardinoglu A, Sivertsson A, Kampf C, Sjostedt E, Asplund A et al. 2015. Proteomics. Tissue-based map of the human proteome. Science. 347(6220):1260419.
